# Supplementary material for: Synthesis and Antimicrobial Activity of Sulfenimines Based on Pinane Hydroxythiols
Source: MDPI journal article supplement (doi:10.3390/antibiotics11111548), 2022-11-04

# **Antibiotics**

## **Supplementary Materials**

### **Synthesis and antimicrobial activity of sulfenimines based on pinane hydroxythiols**

Nikita O. Ilchenko, Denis V. Sudarikov, Roman V. Rummyantsev, Diana R. Baidamshina, Nargiza D. Zakarova, Monyr Nait Yahia, Airat R. Kayumov, Aleksandr V. Kutchin and Svetlana A. Rubtsova

Chemical structure of compound 10: CC1(C)CC(C2=CC(=C(C=C2)O)S1)C3=CC(=C(C=C3)O)I

<sup>1</sup>H NMR spectrum (CDCl<sub>3</sub>):

- 8.34, 7.98, 7.98, 7.41, 7.41, 3.83, 3.79, 3.77, 3.74, 3.71, 3.68, 3.66, 3.64, 3.63, 3.62, 3.61, 3.59, 2.69, 2.64, 2.61, 2.51, 2.49, 2.48, 2.46, 2.44, 2.27, 2.26, 2.25, 2.24, 2.21, 2.21, 2.20, 2.17, 2.17, 2.06, 2.04, 1.27, 1.25, 1.14, 1.11, 1.02 ppm

<sup>13</sup>C NMR spectrum (CDCl<sub>3</sub>):

- 158.46, 157.71, 147.85, 138.86, 121.81, 86.66, 80.78, 66.18, 42.85, 42.64, 41.85, 38.92, 35.61, 32.54, 27.60, 23.60 ppm

IR spectrum (KBr):

- 3404.36, 3383.14, 3059.10, 2983.88, 2924.09, 2873.94, 2738.98, 2619.33, 2576.90, 2167.99, 2076.41, 1741.72, 1668.78, 1673.91, 1633.41, 1573.91, 1431.18, 1394.89, 1366.50, 1346.31, 1271.08, 1217.08, 1153.43, 1091.71, 1046.42, 995.27, 947.05, 864.11, 802.38, 738.74, 669.86, 630.72, 561.84, 507.28, 432.05 cm<sup>-1</sup>

$^1\text{H}$ ,  $^{13}\text{C}$  (JMOD) NMR and IR spectra of compound 8a

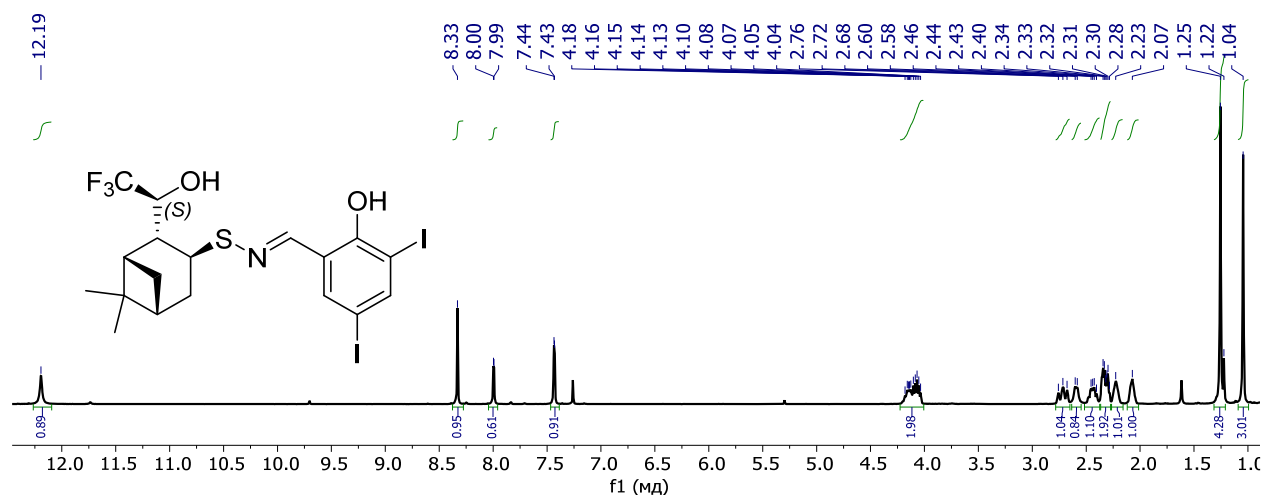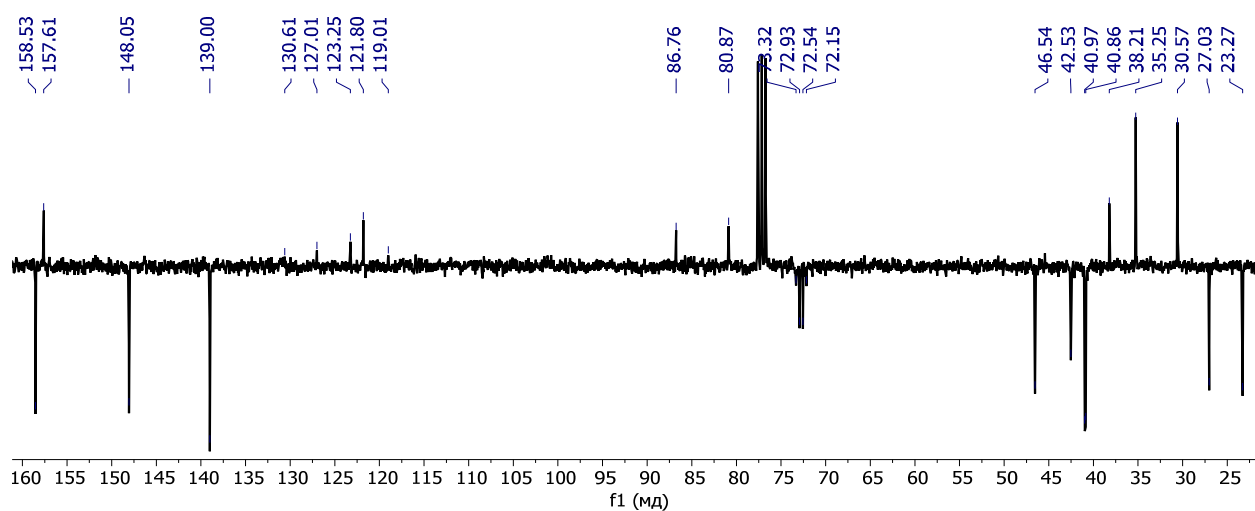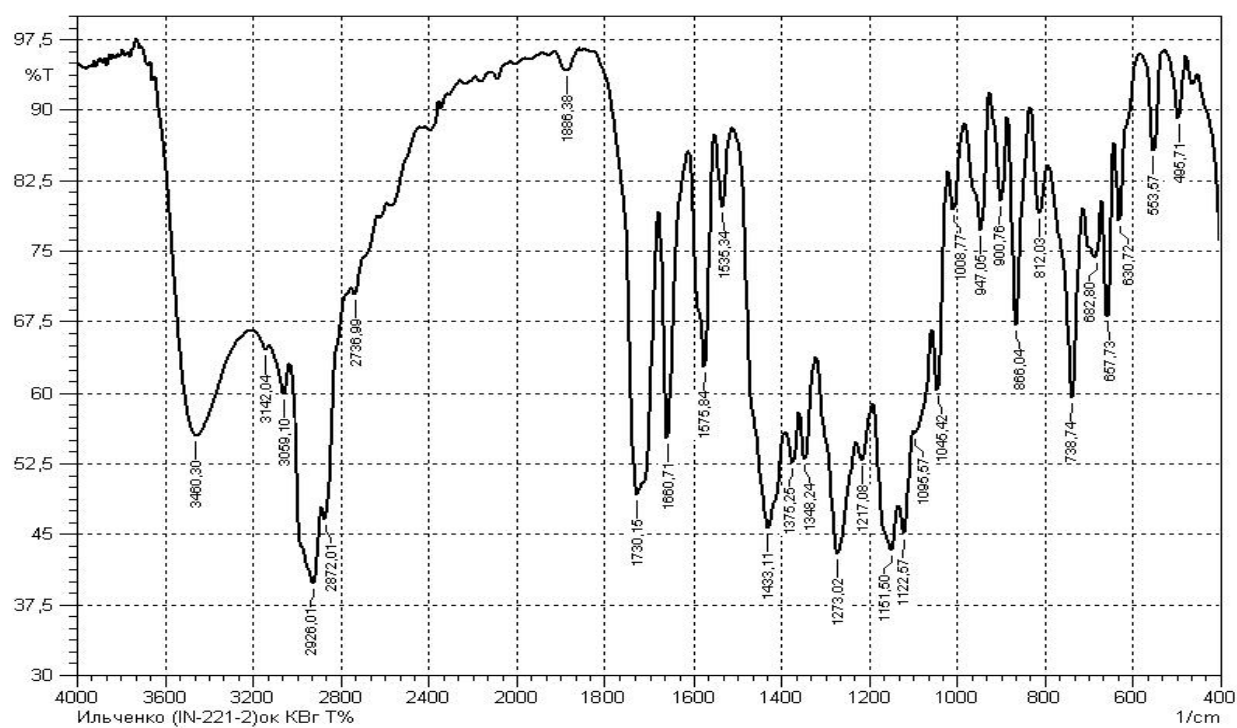

$^1\text{H}$ ,  $^{13}\text{C}$  (JMOD) NMR and IR spectra of compound 9a

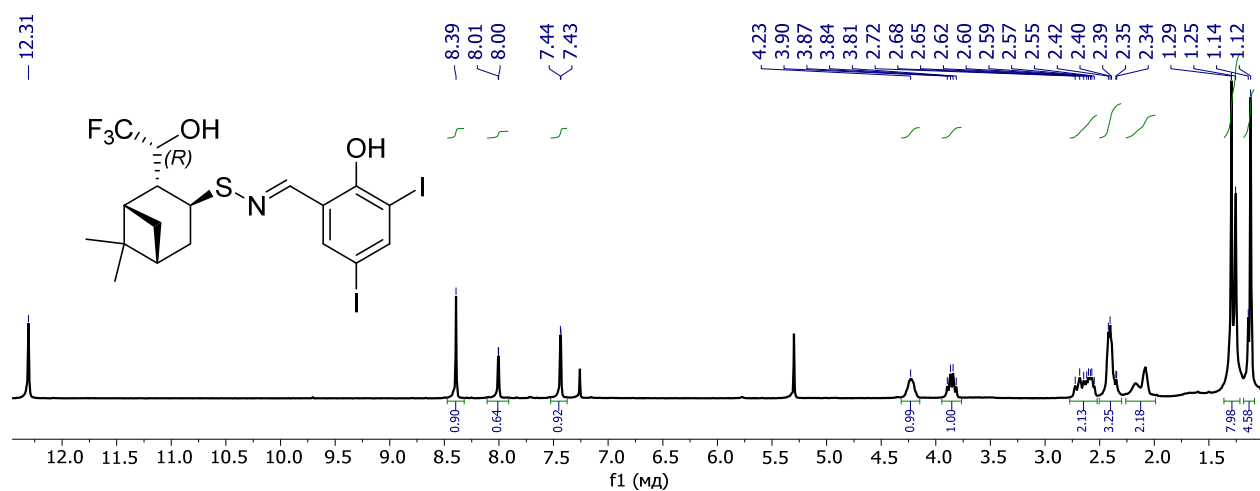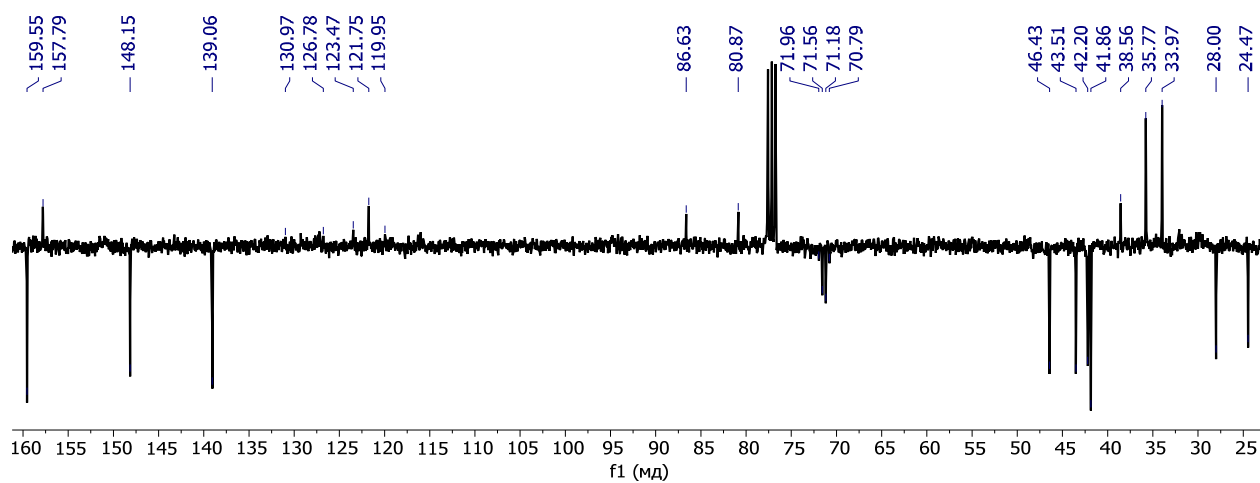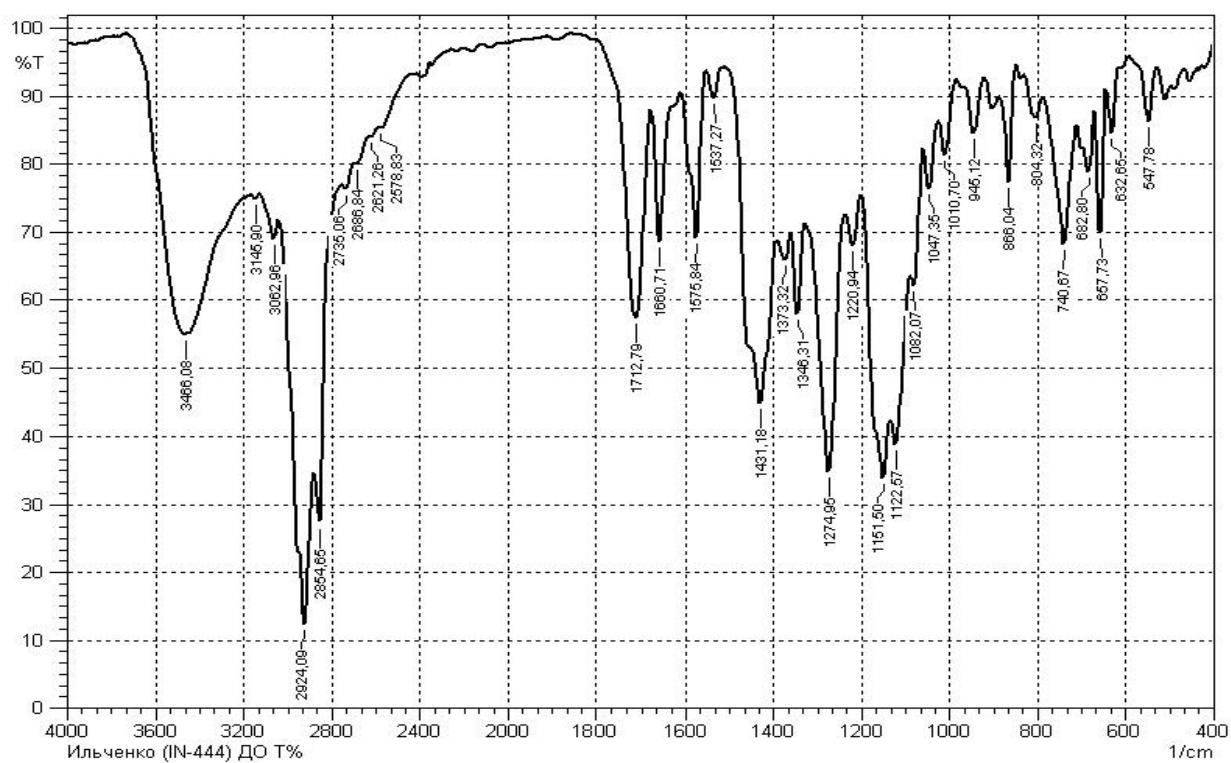

$^1\text{H}$ ,  $^{13}\text{C}$  (JMOD) NMR and IR spectra of compound **7b**

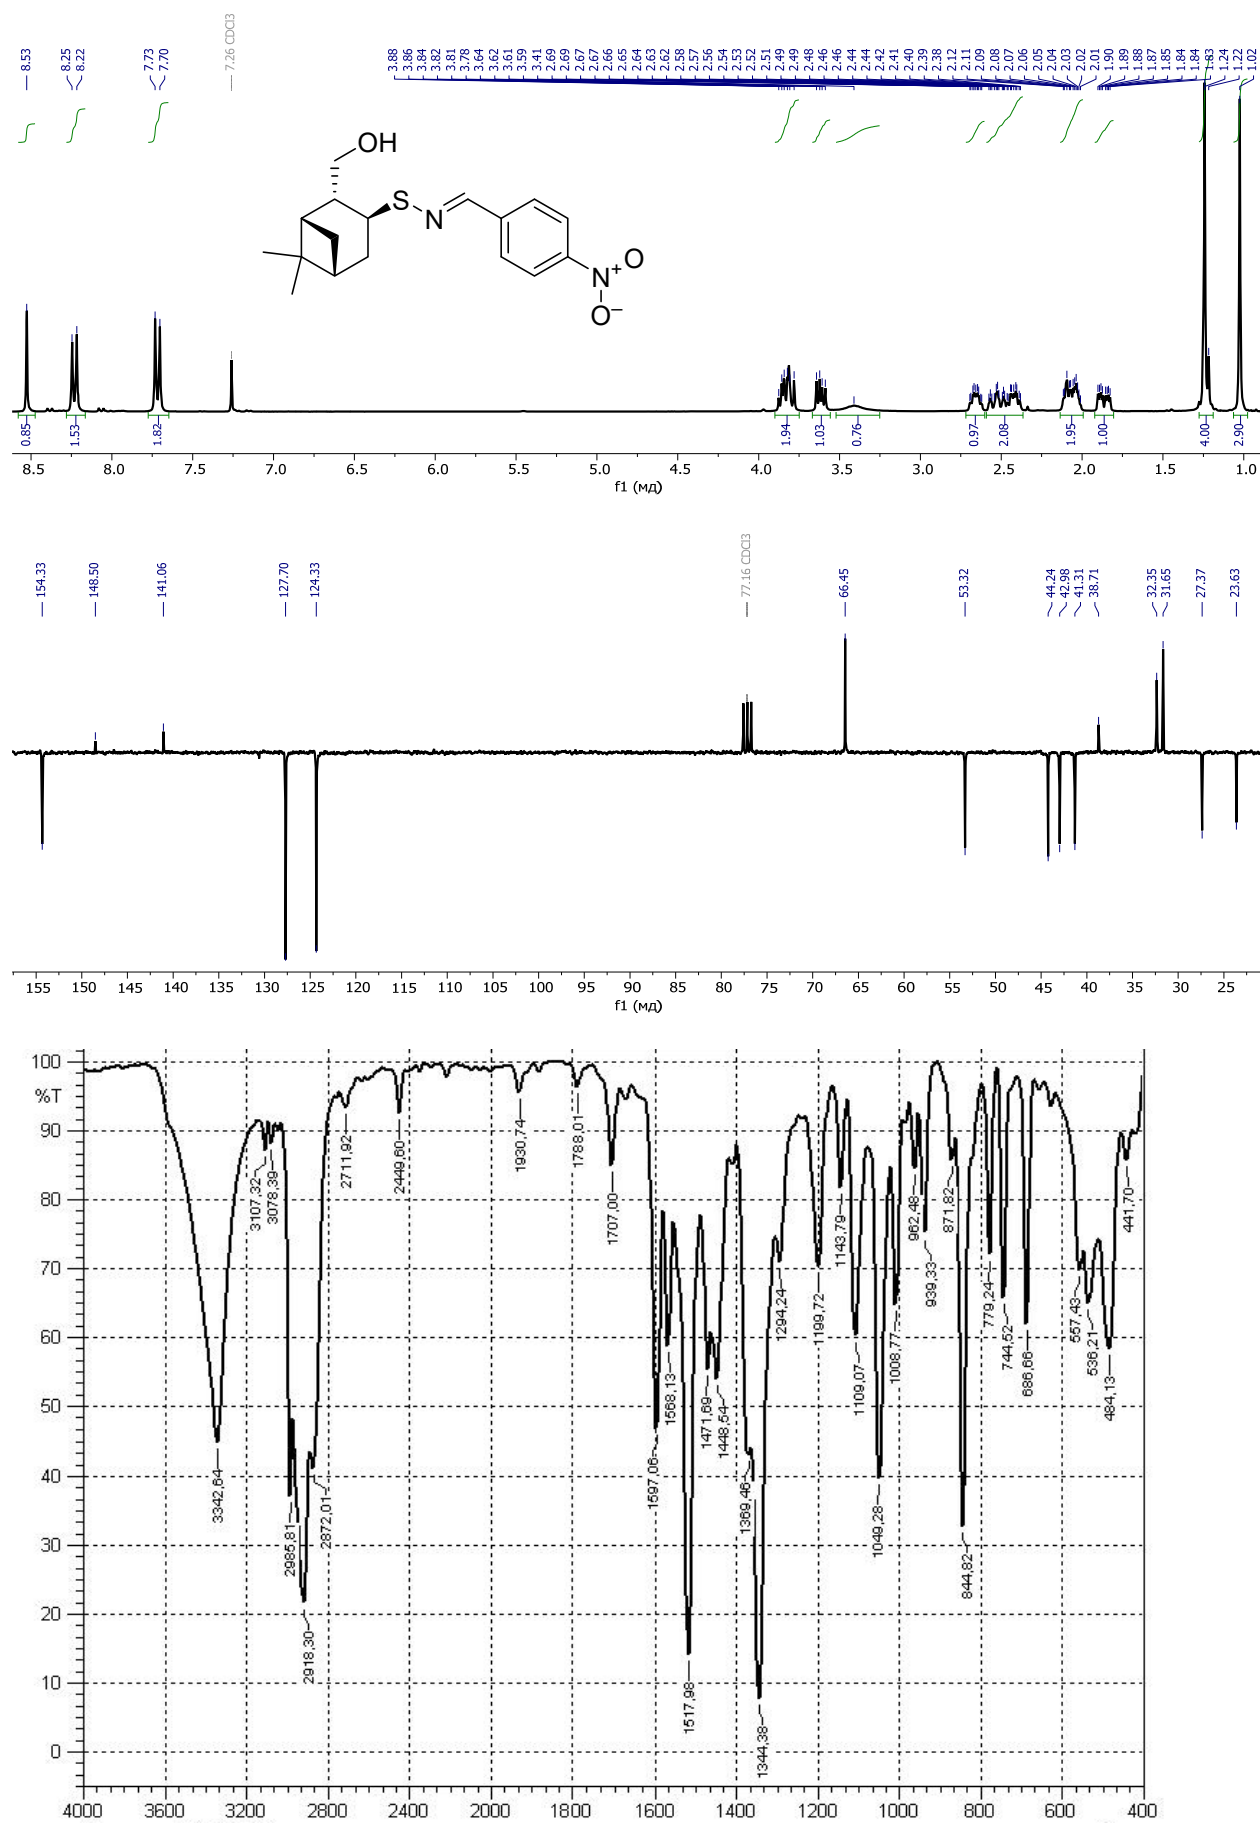

[illegible]

$^1\text{H}$ ,  $^{13}\text{C}$  (JMOD) NMR and IR spectra of compound **7c**

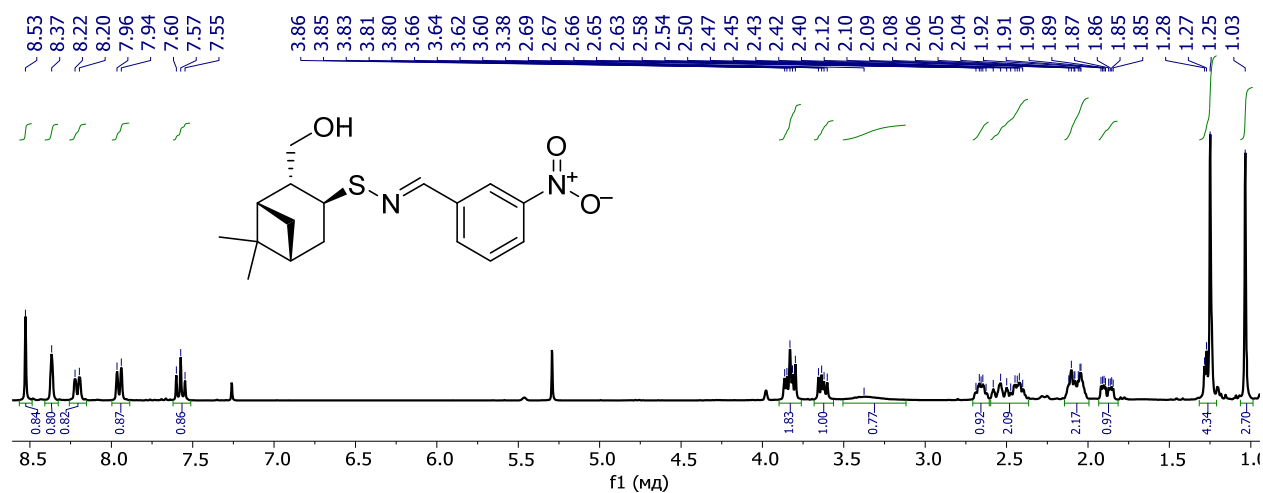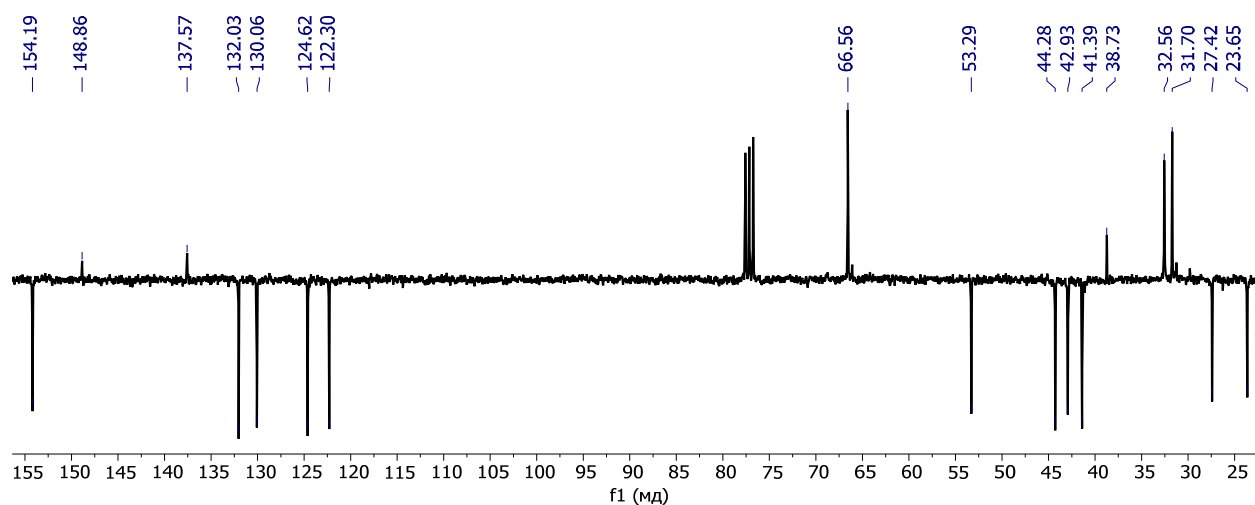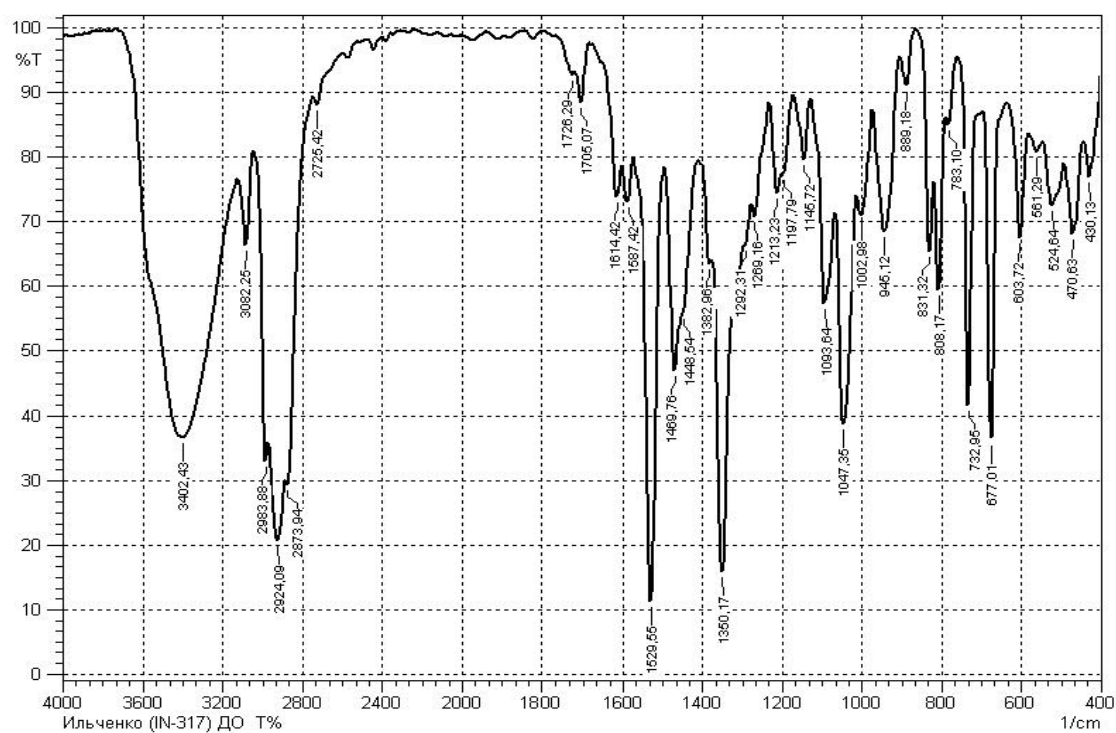



$^1\text{H}$ ,  $^{13}\text{C}$  (JMOD) NMR and IR spectra of compound **8c**

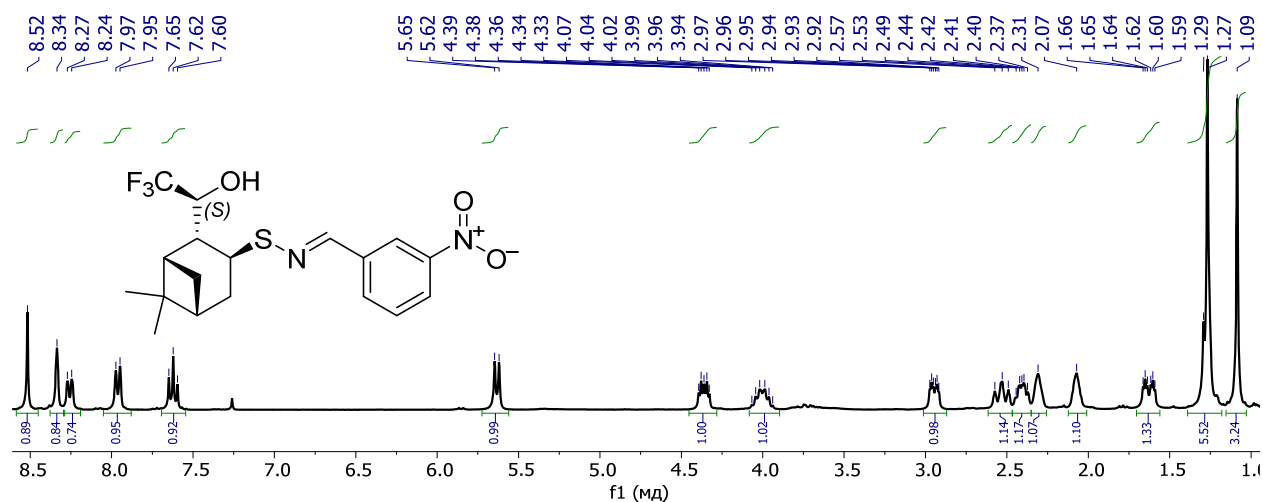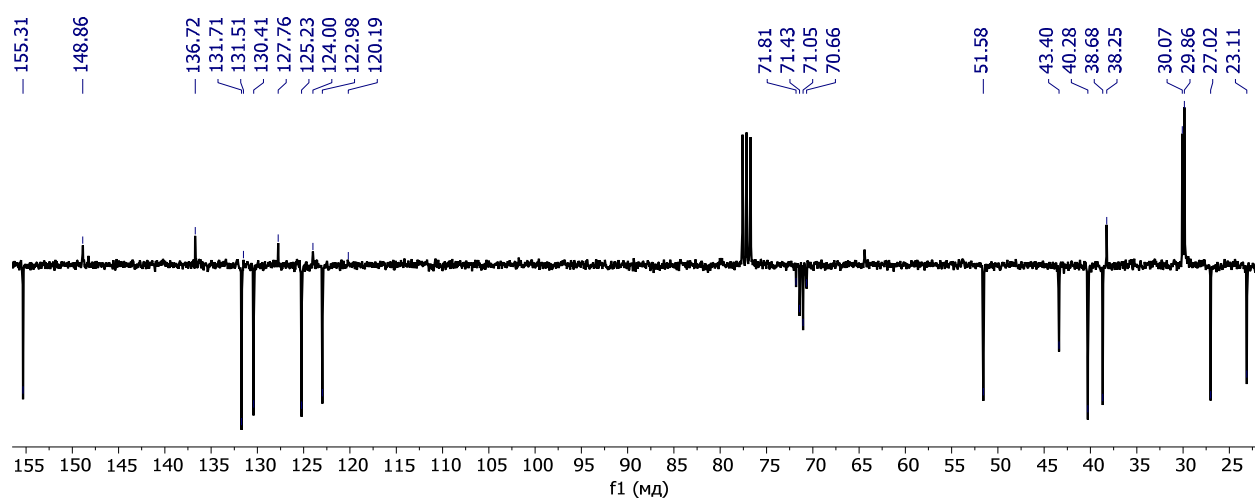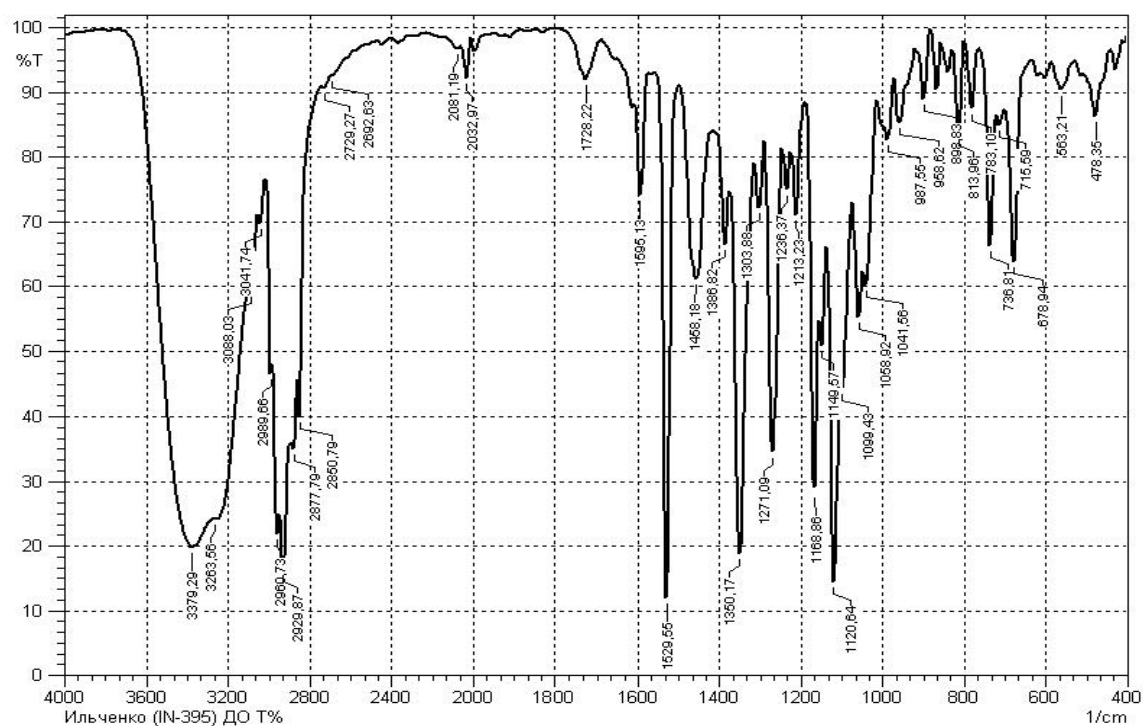



$^1\text{H}$ ,  $^{13}\text{C}$  (JMOD) NMR and IR spectra of compound **7d**

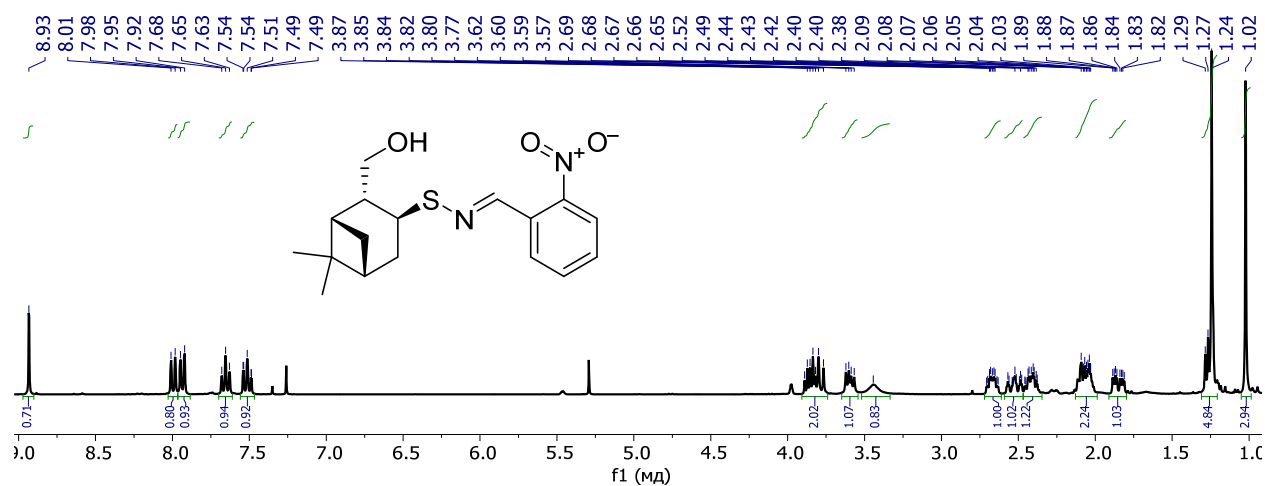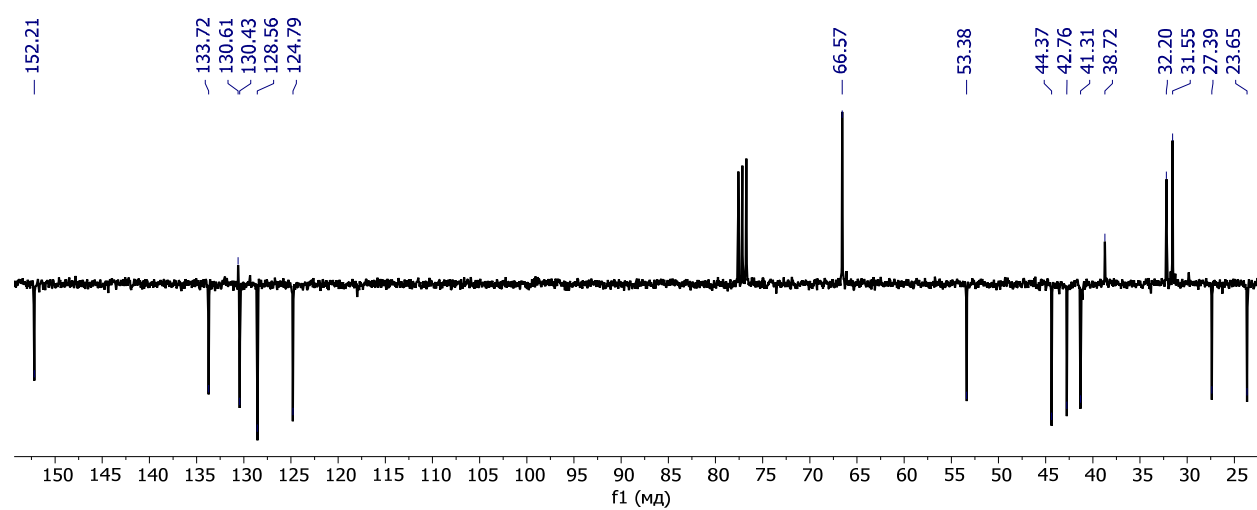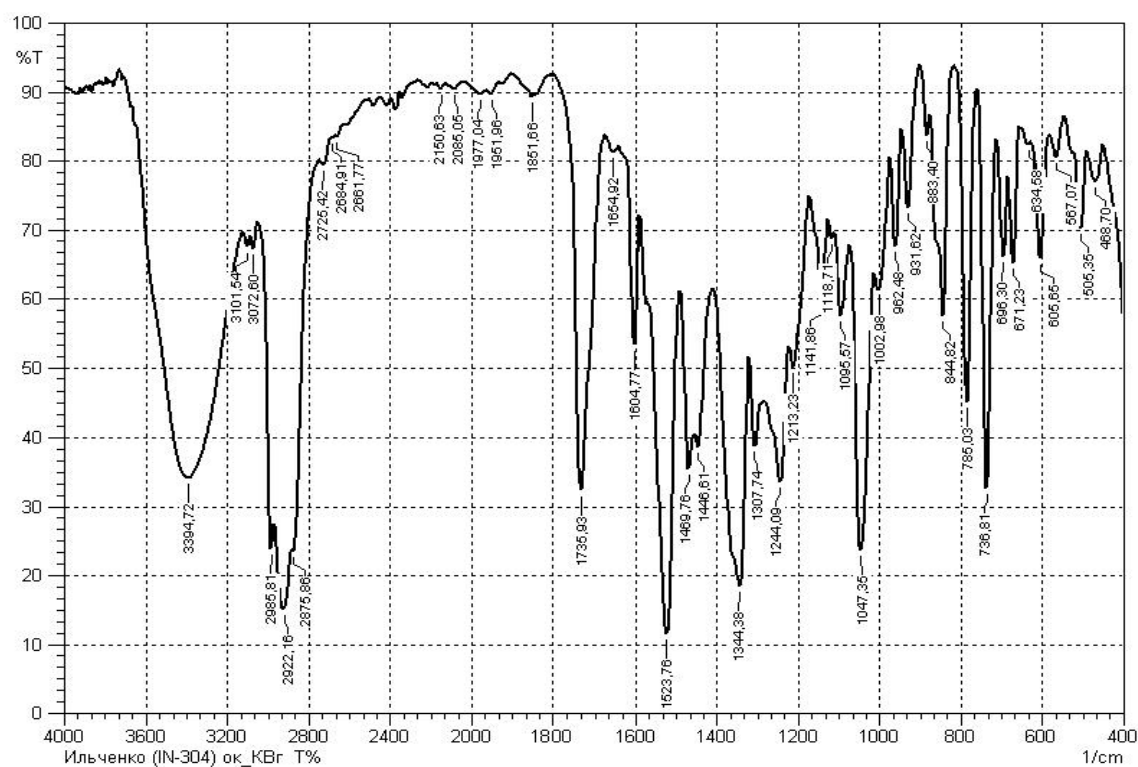

$^1\text{H}$ ,  $^{13}\text{C}$  (JMOD) NMR and IR spectra of compound **8d**

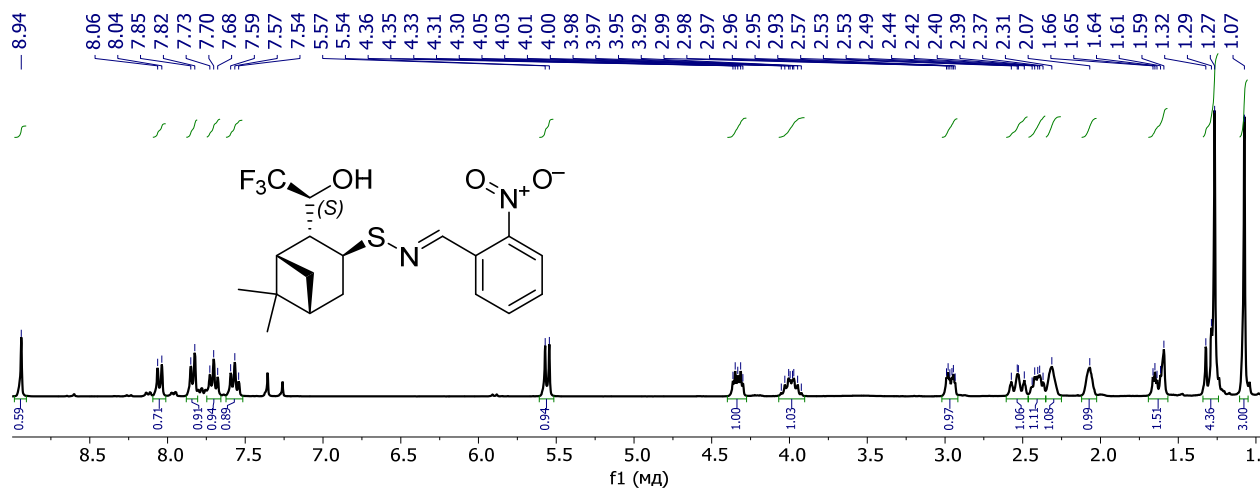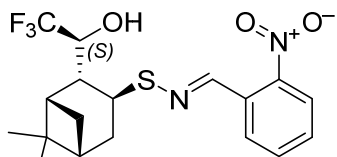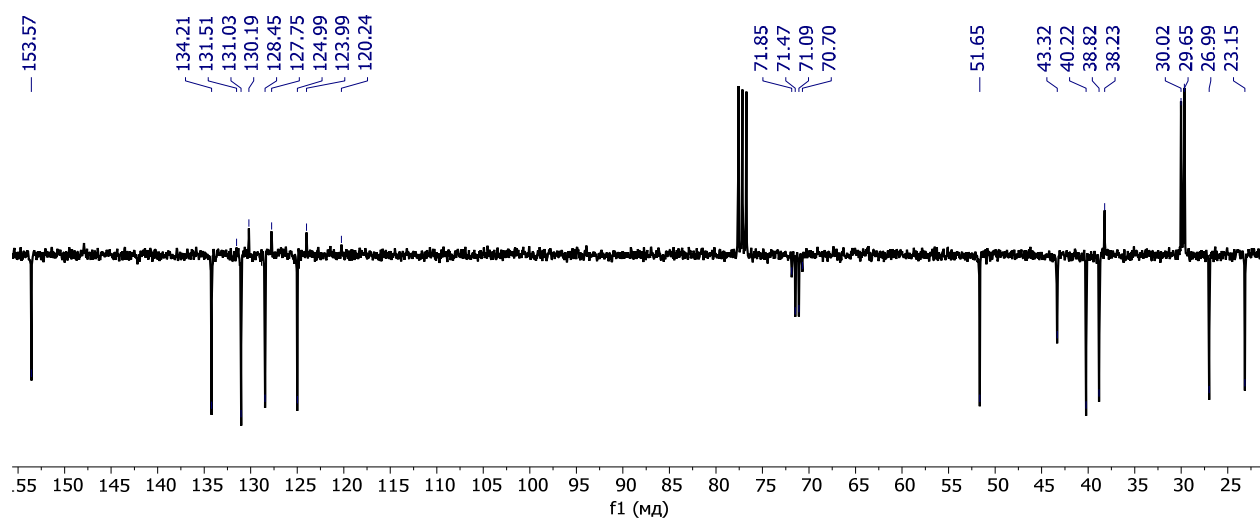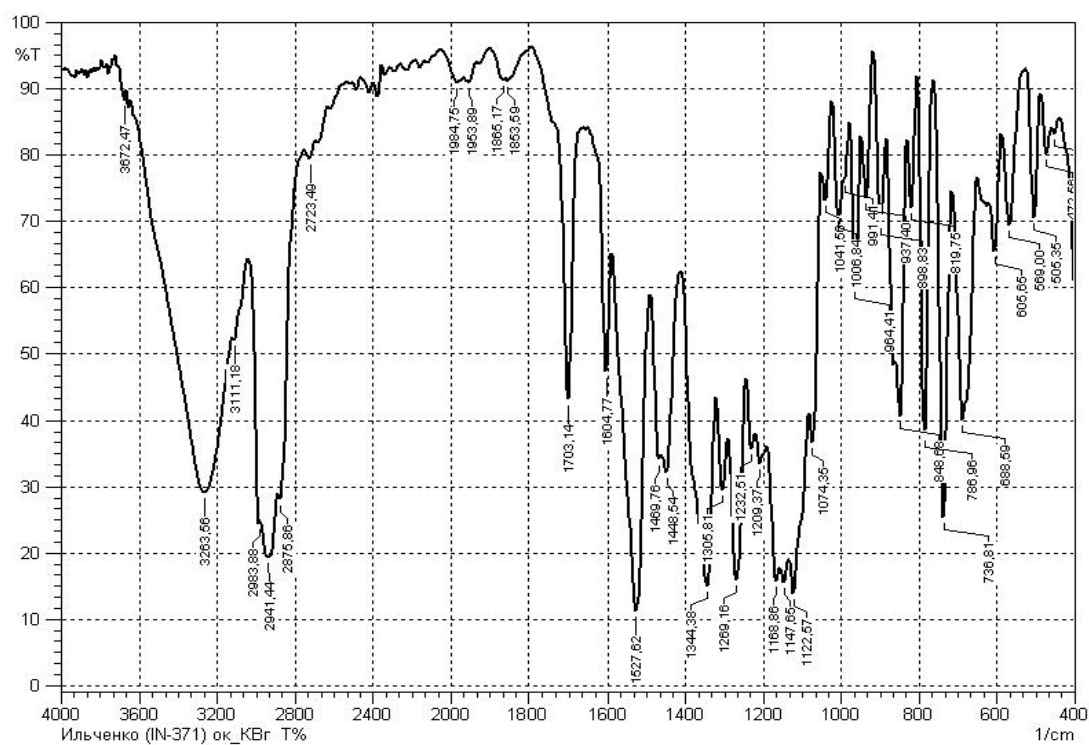

$^1\text{H}$ ,  $^{13}\text{C}$  (JMOD) NMR and IR spectra of compound **7e**

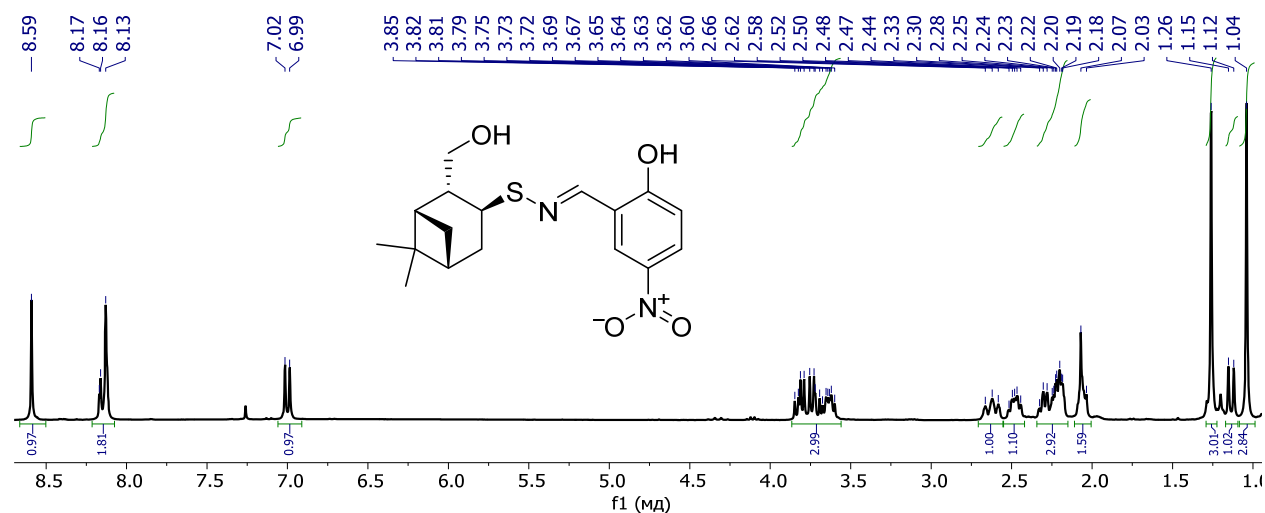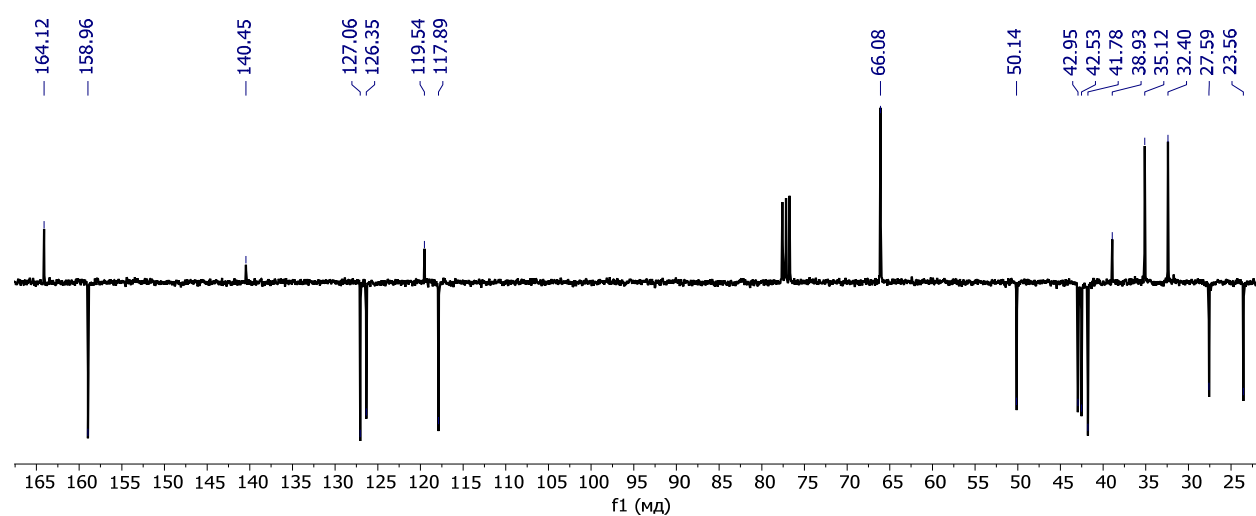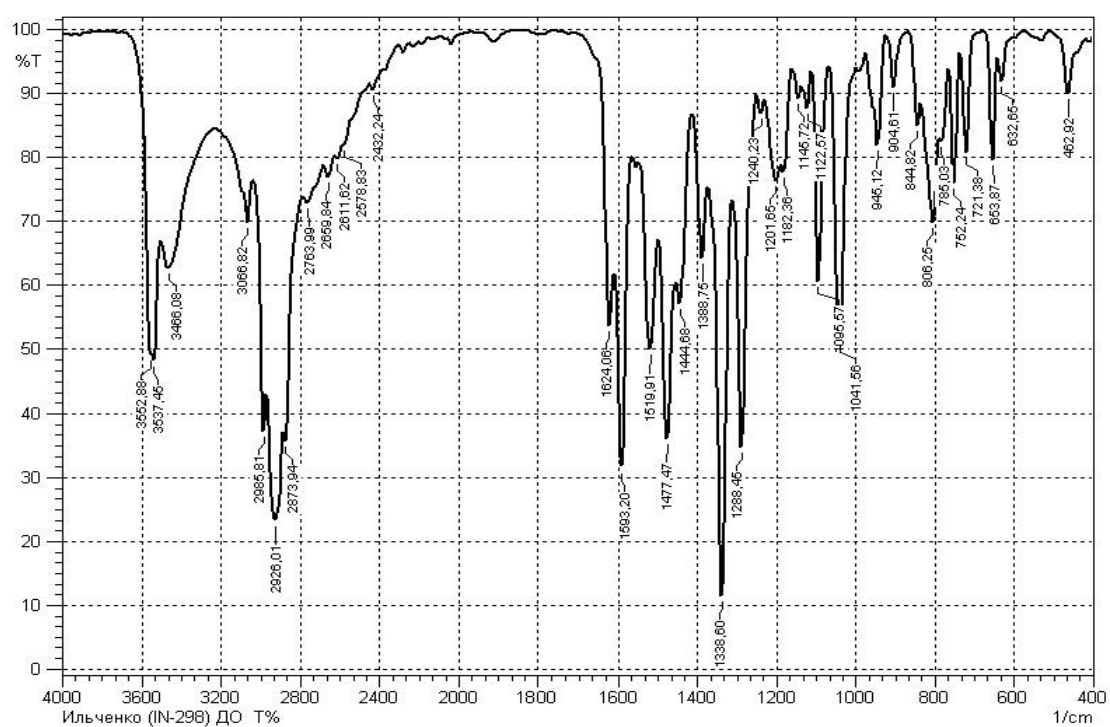

$^1\text{H}$ ,  $^{13}\text{C}$  (JMOD) NMR and IR spectra of compound **8e**

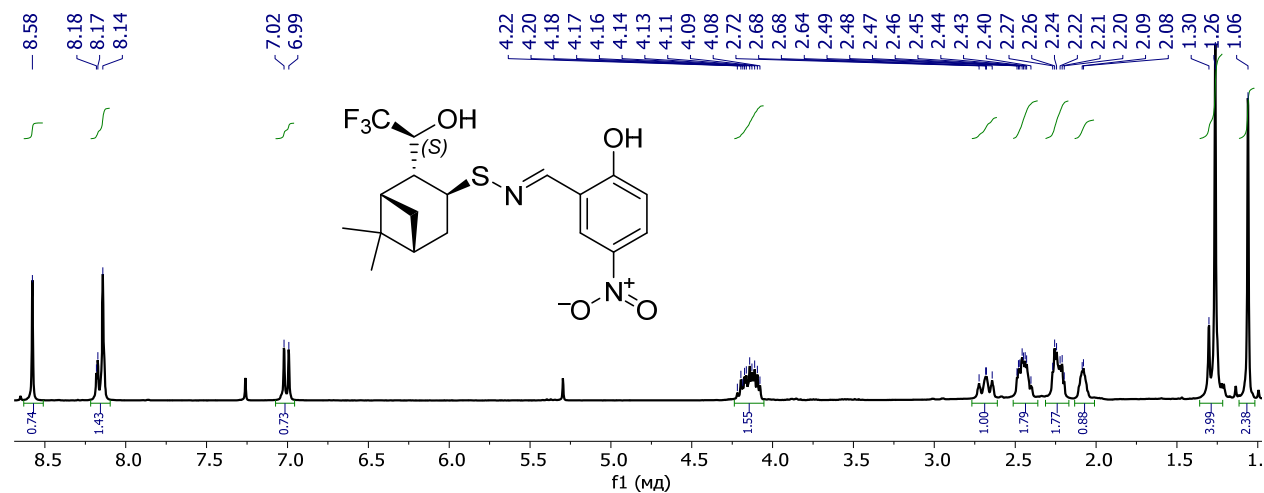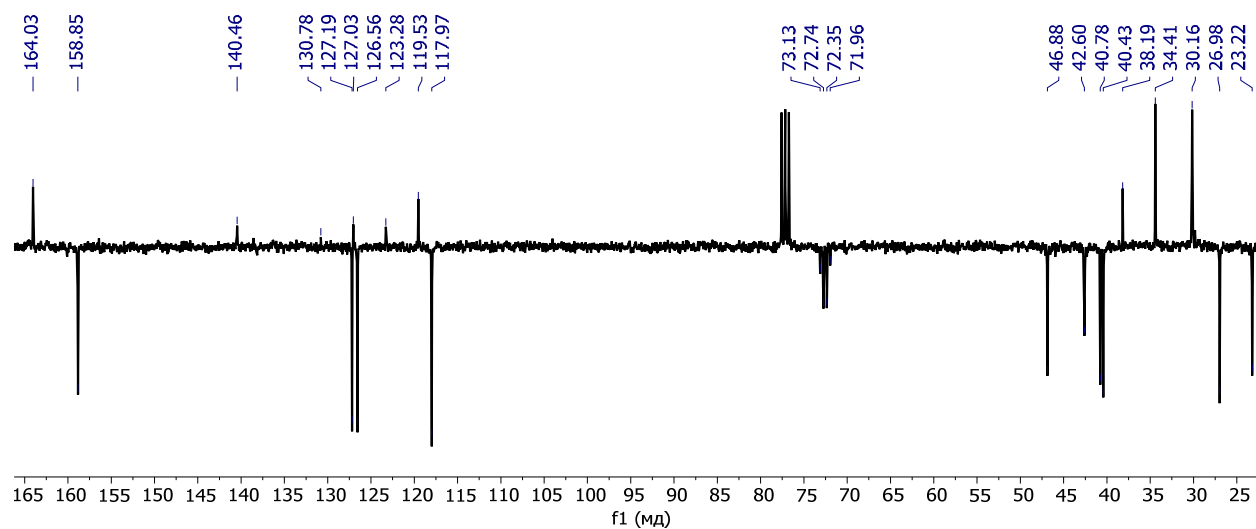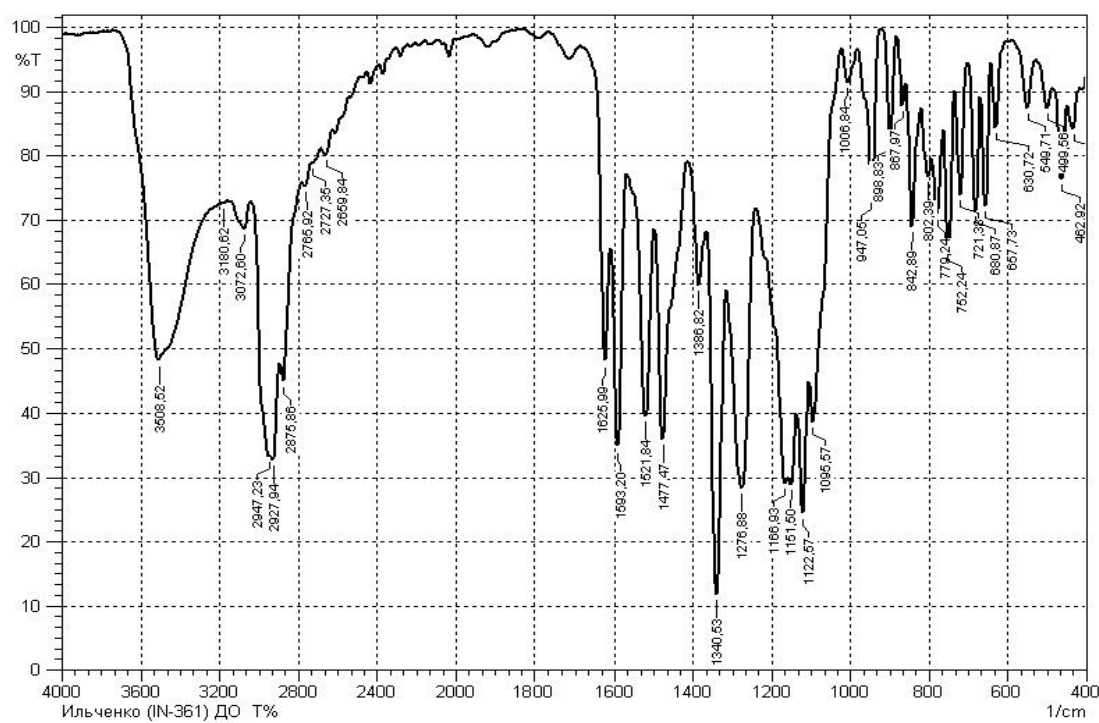

$^1\text{H}$ ,  $^{13}\text{C}$  (JMOD) NMR and IR spectra of compound **7f**

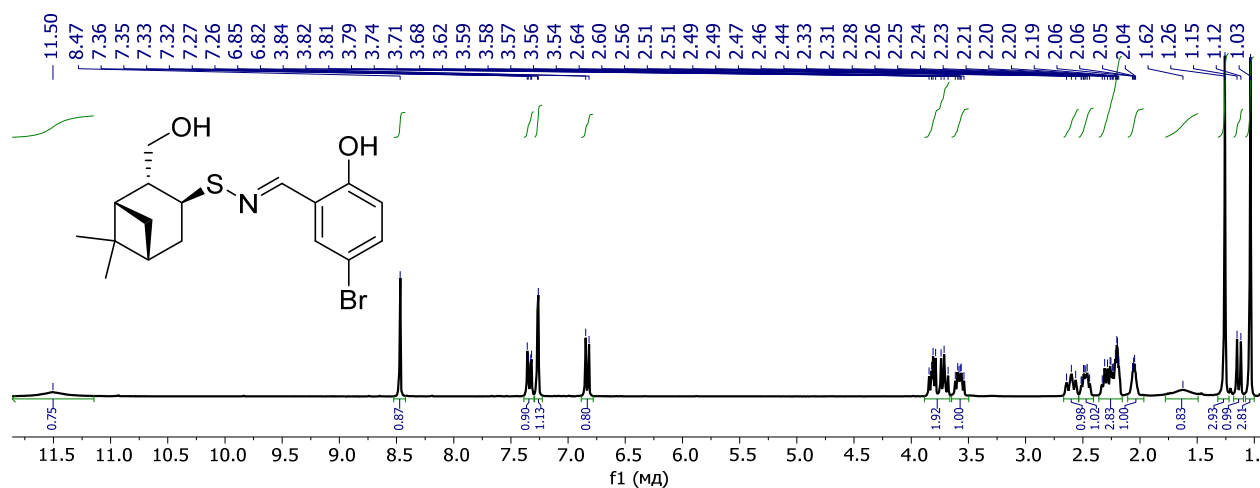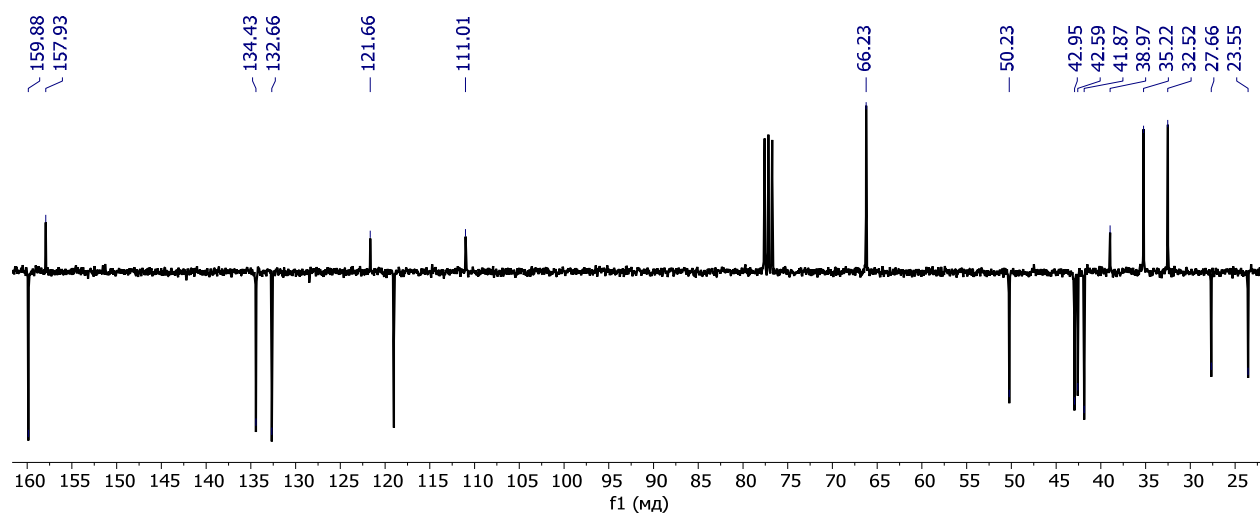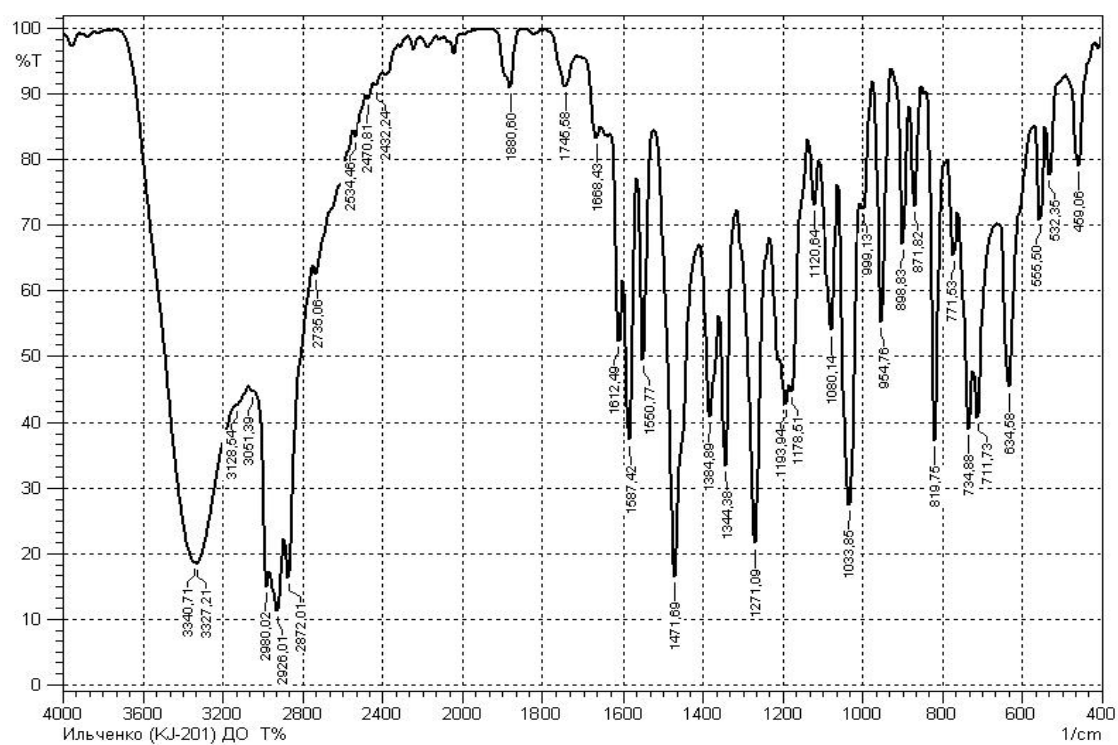

$^1\text{H}$ ,  $^{13}\text{C}$  (JMOD) NMR and IR spectra of compound **8f**

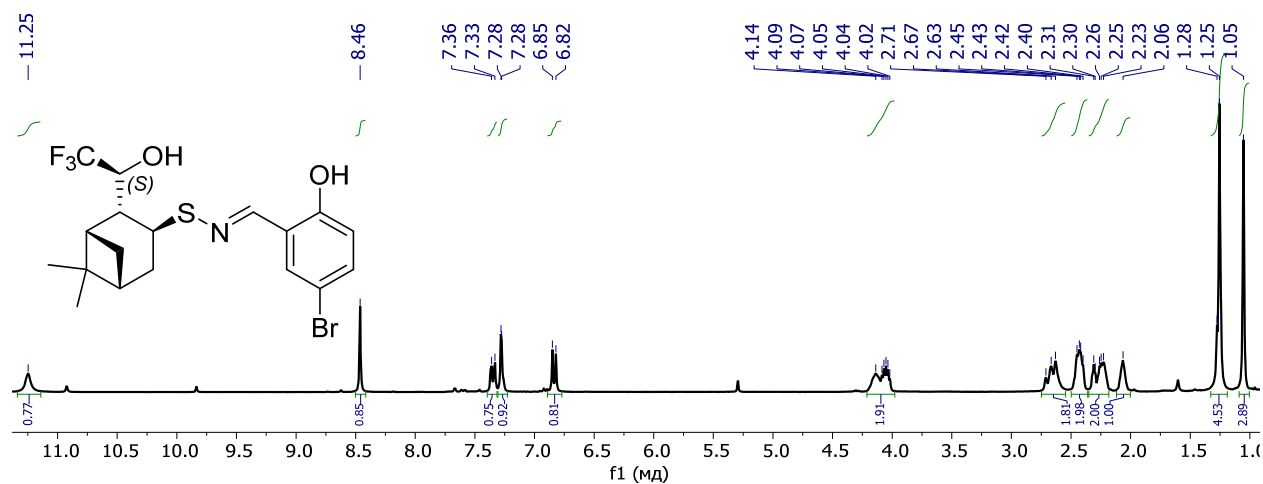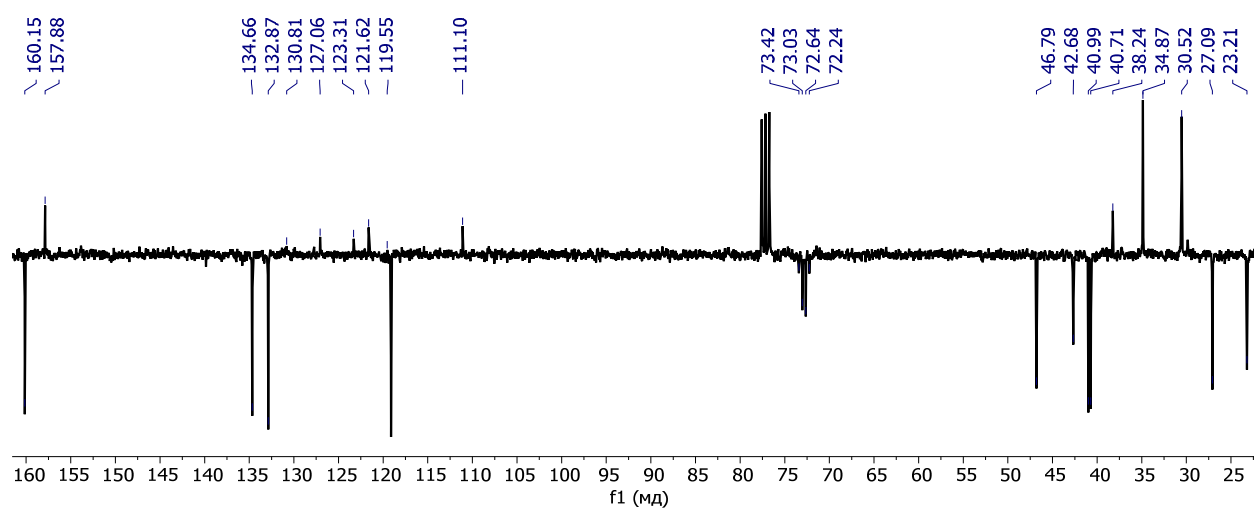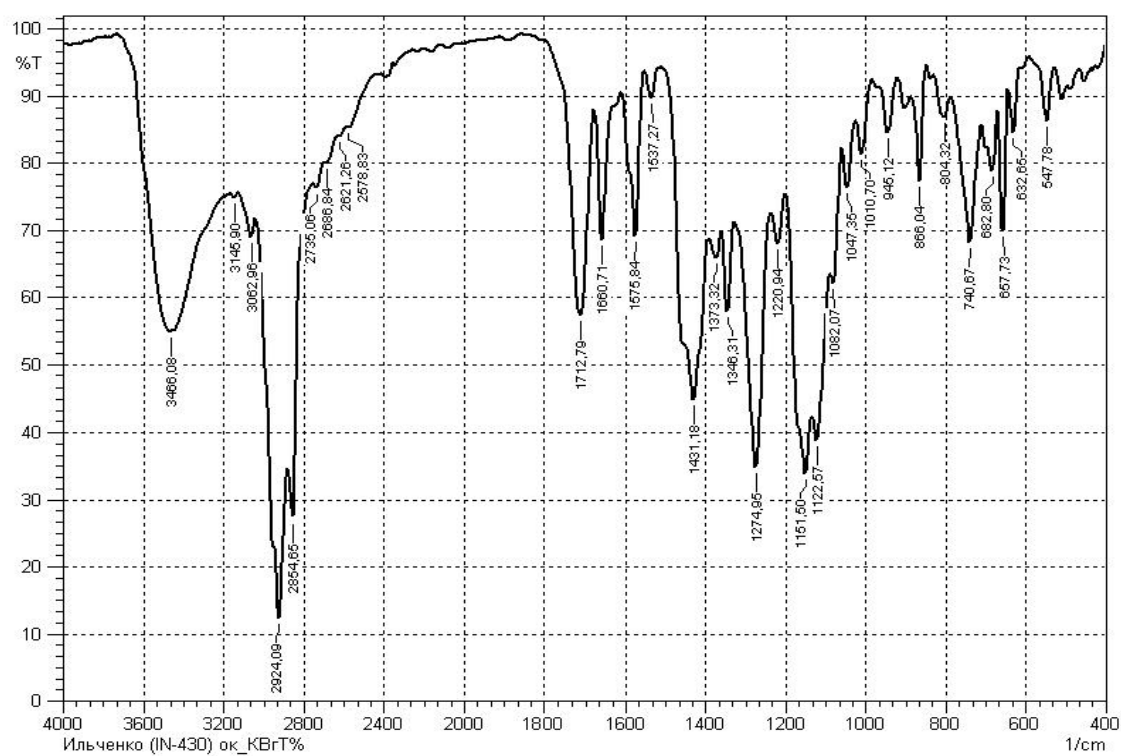

Supplement: s1 [file s1]
